# Supplementary material for: Multi-lineages of Shiikuwasha (Citrus depressa Hayata) evaluated by using whole chloroplast genome sequences and its bio-diversity in Okinawa, Japan
Source: PubMed Central journal article supplement — Breed Sci. 2016 Jul 9;66(4):490–8. doi: 10.1270/jsbbs.15151 (PMC5010300; doi:10.1270/jsbbs.15151), 2016-07-09
Supplement: 66_15151_1.pdf [file 66_15151_1.pdf]

Supplmental Table 1. Nuclear SSR markers mentioned in Xu *et al.* (2013) applied to Shiikuwasha

| Marker    | Forward                  | Reverse                 | Remark             |
|-----------|--------------------------|-------------------------|--------------------|
| Csin.0384 | ACAGCAACAGCAACAGCAAC     | TGAGAATTGTGGAGCAAGCA    | NA (not amplified) |
| Csin.0384 | ACAGCAACAGCAACAGCAAC     | TGAGAATTGTGGAGCAAGCA    | NA                 |
| Csin.0479 | GGGGCCATCTCTTGAGACTA     | ATGGTGGCATCTCGAACAAT    | NA                 |
| Csin.0543 | CCTTAGTTGATTATTGTCGTTTGT | TTGCTGTTGTTTTTGTGATGA   | NA                 |
| Ma6_29    | CACTTCTAAACCCGAACCCA     | TTGGAGGAATCAAGAGGGTG    | NA                 |
| Ma3_5     | CACGCACGCATAATGAGTTT     | GGAGATTGCTACCAATAAATCCC | (polymorphic*)     |
| Ma3_18    | ACGTATGGATACTGCGACCC     | TAAAGGGATTCCACAGCGTC    | NA                 |
| Ma3_33    | GGCCGTAACATCACAGTCAA     | GTATCGGGAACCACCATCAC    | NA                 |
| Ma3_35    | CTCCATTACCACCACTCCTCA    | TGACCCATGTCAACCATTG     | NA                 |
| Ma3_44    | TTTCAGTTTCTGCTGACCCC     | GGATTGTGACTGTGGCTGTG    | NA                 |
| Ma3_64    | CGTCCGGAATAATCAACCAA     | GGAAGAATAGCGAACACCCA    | NA                 |
| Ma3_68    | CTGAGGAGAGTGTGAGTGCG     | AACCCAAAGGCAGAACCTG     | NA                 |
| Ma3_80    | TGATGGCTTTCGAGTCACTG     | CCTATGTAAAGCCTCGCTGC    | NA                 |
| Ma3_98    | GATCACCACAAGCAGCACAC     | TCTCAAGAGCCCAGTTCGAT    | polymorphic        |
| Ma3_112   | ACGCGTCCGAAAGTAAAGAAA    | TCTGGATGGAGTCGTAAGGC    | NA                 |
| Ma3_117   | TCCGGGACACACTTCTAACC     | TGGTATGCAGCATGACGTTT    | NA                 |
| Ma3_122   | ACACAAATCTGCCACATCA      | GTGTGTGCATGGATGAGGAG    | NA                 |
| Ma3_130   | TCTTTGTCTTCTGGCCTCTG     | ATGTCCATCTCGAAGCTCGT    | NA                 |
| Ma3_142   | TTTCTTCGTCAACCCCAAAG     | TAGAAGAAGGACCCCGAACC    | polymorphic        |
| Ma3_151   | TTTTGCCACTGCACTCAATC     | TAAAGGTTTAGGCGGGAGGT    | NA                 |
| Ma3_161   | GCATGCAAAACAGCTTGAAA     | CTTGATGGGTAGTTGTGCCA    | NA                 |
| Ma3_166   | TCCGGTACCAAATCACAAATC    | GGCATAATAGCTTTGAGCCG    | NA                 |
| Ma3_168   | GATTCTTCTTTCGGCTGCTG     | GCTCGACAGGTTGTTGGTTT    | polymorphic        |
| Ma3_178   | TTTCGCGGGATTAATTGAAG     | CCAAGTTTTCGACTTCAGGC    | NA                 |
| Ma3_179   | GGCTTCGATTCTGGATGCTA     | GCAACCTTTTCTTCTTGTGG    | NA                 |
| Ma3_191   | GATGGCGGGAATAGCAATAA     | CAAGAACCGAGAGGCAAAAAG   | NA                 |
| Ma3_200   | ATGTGACGTTGACCAATGA      | TTTCGCTTCTCAGGTGGACT    | polymorphic        |
| Ma2_582   | GACATGTCACACAAGCAGGC     | GCAAAAATACAGTTGAAAATGCG | polymorphic        |
| Ma2_1710  | TGGAACATTGAAGTGGGTGA     | ACTTGAGATTAGGGCCGGTT    | polymorphic        |

\*This marker showed unstable amplification. Thus, it was not applied to estimate diversity.

Supplemental Table 2. List of SNPs presumed from NGS data obtained from MM2 accession

| Chromosome | Region | Type | Reference | Allele |
|------------|--------|------|-----------|--------|
| SNP1       | 282    | SNV  | G         | T      |
| SNP2       | 3078   | SNV  | T         | A      |
| SNP3       | 3086   | SNV  | C         | A      |
| SNP4       | 5568   | SNV  | C         | T      |
| SNP5       | 6309   | SNV  | A         | G      |
| SNP6       | 7320   | SNV  | G         | A      |
| SNP7       | 9559   | SNV  | A         | C      |
| SNP8       | 11041  | SNV  | T         | C      |
| SNP9       | 12653  | SNV  | C         | G      |
| SNP10      | 12806  | SNV  | A         | C      |
| SNP11      | 14040  | SNV  | C         | A      |
| SNP12      | 17470  | SNV  | T         | C      |
| SNP13      | 23257  | SNV  | T         | G      |
| SNP14      | 23363  | SNV  | T         | C      |
| SNP15      | 27243  | SNV  | C         | A      |
| SNP16      | 33340  | SNV  | T         | G      |
| SNP17      | 35351  | SNV  | C         | A      |
| SNP18      | 36140  | SNV  | A         | C      |
| SNP19      | 38215  | SNV  | A         | C      |
| SNP20      | 41051  | SNV  | A         | T      |
| SNP21      | 44357  | SNV  | A         | C      |
| SNP22      | 45627  | SNV  | A         | C      |
| SNP23      | 49450  | SNV  | C         | A      |
| SNP24      | 49898  | SNV  | T         | A      |
| SNP25      | 50074  | SNV  | G         | T      |
| SNP26      | 54420  | SNV  | G         | A      |
| SNP27      | 55629  | SNV  | T         | G      |
| SNP28      | 56377  | SNV  | C         | G      |
| SNP29      | 68608  | SNV  | G         | A      |
| SNP30      | 69566  | SNV  | C         | A      |
| SNP31      | 69726  | SNV  | C         | G      |
| SNP32      | 69997  | SNV  | G         | T      |
| SNP33      | 71966  | SNV  | C         | A      |
| SNP34      | 74586  | SNV  | A         | C      |
| SNP35      | 75266  | SNV  | T         | C      |
| SNP36      | 76225  | SNV  | A         | C      |
| SNP37      | 76319  | SNV  | G         | A      |
| SNP38      | 78113  | SNV  | T         | G      |
| SNP39      | 78452  | SNV  | G         | A      |
| SNP40      | 78954  | SNV  | T         | C      |
| SNP41      | 83814  | SNV  | C         | G      |
| SNP42      | 84450  | SNV  | T         | G      |
| SNP43      | 86719  | SNV  | A         | T      |
| SNP44      | 114697 | SNV  | C         | A      |
| SNP45      | 115100 | SNV  | A         | G      |
| SNP46      | 117267 | SNV  | A         | C      |
| SNP47      | 118376 | SNV  | C         | A      |
| SNP48      | 118676 | SNV  | A         | G      |
| SNP49      | 119636 | SNV  | C         | A      |
| SNP50      | 120227 | SNV  | A         | T      |
| SNP51      | 123024 | SNV  | G         | T      |
| SNP52      | 124007 | SNV  | A         | C      |
| SNP53      | 125276 | SNV  | T         | G      |
| SNP54      | 127176 | SNV  | G         | T      |
| SNP55      | 130204 | SNV  | T         | G      |
| SNP56      | 130332 | SNV  | T         | G      |
| SNP57      | 131104 | SNV  | C         | A      |
| SNP58      | 132216 | SNV  | A         | C      |
| SNP59      | 132396 | SNV  | T         | G      |
| SNP60      | 132915 | SNV  | A         | C      |
| SNP61      | 133177 | SNV  | G         | T      |
| SNP62      | 136291 | SNV  | G         | A      |
| SNP63      | 136306 | SNV  | A         | T      |
| SNP64      | 136320 | SNV  | C         | T      |
| SNP65      | 136333 | SNV  | C         | A      |
| SNP66      | 136344 | SNV  | A         | T      |
| SNP67      | 136347 | SNV  | A         | G      |
| SNP68      | 136352 | SNV  | C         | A      |
| SNP69      | 136354 | SNV  | C         | A      |
| SNP70      | 136357 | SNV  | G         | A      |
| SNP71      | 136359 | SNV  | G         | A      |

Supplemental Table 3. List of INDELs presumed with NGS data obtained from MM2 accession

| Region         | Type      | Reference    | Allele  | Markers       |
|----------------|-----------|--------------|---------|---------------|
| 4201^4202      | Insertion | -            | ATATTTA | MM2-cpINDEL 1 |
| 4485^4486      | Insertion | -            | A       |               |
| 8129..8132     | Deletion  | AAAA         | -       |               |
| 8833^8834      | Insertion | -            | AAT     |               |
| 8915..8926     | Deletion  | TTCTATATTCTC | -       | MM2-cpINDEL 2 |
| 9002^9003      | Insertion | -            | T       |               |
| 13413          | Deletion  | A            | -       |               |
| 15255^15256    | Insertion | -            | T       |               |
| 17532..17540   | Deletion  | CTCTTTTTT    | -       | MM2-cpINDEL 3 |
| 29290          | Deletion  | C            | -       |               |
| 29544^29545    | Insertion | -            | T       |               |
| 31113          | Deletion  | T            | -       |               |
| 31348^31349    | Insertion | -            | A       |               |
| 37371..37372   | Deletion  | GG           | -       |               |
| 37387          | Deletion  | T            | -       |               |
| 38371^38372    | Insertion | -            | T       |               |
| 39335^39336    | Insertion | -            | A       |               |
| 46206^46207    | Insertion | -            | T       |               |
| 46668          | Deletion  | T            | -       |               |
| 46718          | Deletion  | T            | -       |               |
| 47956          | Deletion  | A            | -       |               |
| 48025..48028   | Deletion  | AAAA         | -       |               |
| 48532^48533    | Insertion | -            | A       |               |
| 49034^49035    | Insertion | -            | T       |               |
| 49924          | Deletion  | T            | -       |               |
| 51930^51931    | Insertion | -            | T       |               |
| 54911^54912    | Insertion | -            | T       |               |
| 64311^64312    | Insertion | -            | T       |               |
| 64506^64507    | Insertion | -            | AATTTG  | MM2-cpINDEL 4 |
| 69015..69018   | Deletion  | TTTT         | -       | MM2-cpINDEL 5 |
| 70634^70635    | Insertion | -            | A       |               |
| 70959^70960    | Insertion | -            | AA      |               |
| 71471^71472    | Insertion | -            | AAAC    | MM2-cpINDEL 6 |
| 72550^72551    | Insertion | -            | A       |               |
| 74562^74563    | Insertion | -            | T       |               |
| 74823^74824    | Insertion | -            | AA      |               |
| 78459          | Deletion  | C            | -       |               |
| 81067..81068   | Deletion  | TT           | -       |               |
| 82054..82055   | Deletion  | TT           | -       |               |
| 83618          | Deletion  | A            | -       |               |
| 84146          | Deletion  | T            | -       |               |
| 85198^85199    | Insertion | -            | A       |               |
| 86806^86807    | Insertion | -            | GTTCTTT | MM2-cpINDEL 7 |
| 117908..117915 | Deletion  | TTTTAACA     | -       | MM2-cpINDEL 8 |
| 118545^118546  | Insertion | -            | A       |               |
| 118605^118606  | Insertion | -            | AA      |               |
| 119083..119086 | Deletion  | TTTT         | -       |               |

Supplemental Table 4. Genetic diversity measured by number of plastid types and nuclear haplotypes

| Genotypes     | Ogimi |      | Nago |      | Kunigami |      |
|---------------|-------|------|------|------|----------|------|
|               | Dom.  | Wild | Dom. | Wild | Dom.     | Wild |
| Plastid types | 1     | 13   | 2    | 8    | 9        | 5    |
| n=            | 29    | 73   | 20   | 42   | 114      | 67   |
| Nuclear       |       |      |      |      |          |      |
| haplotypes    | 1     | 13   | 5    | 11   | 9        | 22   |
| n=            | 29    | 71   | 20   | 42   | 114      | 67   |
